# Supplementary material
Source: MDPI journal article supplement (https://www.mdpi.com/1999-4907/6/8/2719)
Supplement: s1 [file s1]

Supplemental Materials

Benthic invertebrate data for statistical analysis. For kick net and Hester-Dendy samples, three sampling intervals that represent spring (March and April for kick net samples, April and May for Hester-Dendy samples due to equipment availability), summer (July and August), and fall (October and November) across two years were used to assess the influence of riparian eastern hemlock on benthic collectors and grazers. Only one year’s data are available for the Surber sampler, and only one set of fall data are available for the Hester-Dendy samples due to low stream flow.

**Table S1.** Dominant riparian vegetation, location, and season effects on abundance of collectors and grazers collected monthly via (a) kick nets; (b) Surber samplers; and (c) Hester-Dendy Samplers in eastern hemlock and deciduous dominated headwater streams of eastern Kentucky (USA).

| **Classification** | **Location** | **Vegetation** | **Season** | **Location × Vegetation** | **Location × Season** | **Vegetation × Season** |
| --- | --- | --- | --- | --- | --- | --- |
| a. Kick net | F2,48/P | F1,48/P | F2,100/P | F2,48/P | F4,100/P | F2,100/P |
| Chironomidae | 7.3/<0.01 | 4.2/0.04 | 11.3/<0.01 | 5.4/<0.01 | 4.2/<0.01 | 0.4/0.68 |
| Ephemerellidae | 0.7/0.53 | 0.3/0.61 | 4.0/0.02 | 1.0/0.39 | 7.1/<0.01 | 2.1/0.12 |
| Leptophlebiidae | 1.6/0.21 | 3.1/0.08 | 8.9/<0.01 | 1.1/0.33 | 3.4/0.01 | 0.9/0.41 |
| Baetidae | 0.8/0.47 | 0.1/0.711 | 11.1/<0.01 | 0.2/0.80 | 0.6/0.67 | 0.0/0.98 |
| Siphlonuridae | 0.8/0.47 | 0.1/0.88 | 13.1/<0.01 | 0.2/0.80 | 0.9/0.49 | 0.1/0.88 |
| Ameletidae | 0.0/1.0 | 0.0/1.0 | 0.0/1.0 | 2.3/0.11 | 0.0/1.0 | 0.0/1.0 |
| Ephemeridae | 7.4/<0.01 | 2.6/0.11 | 0.2/0.85 | 0.7/0.50 | 1.5/0.22 | 0.3/0.77 |
| Psychomyiidae | 0.0/1.0 | 0.0/0.99 | 0.0/1 | 0.7/0.53 | 0.3/0.90 | 0.0/1.0 |
| Heptageniidae | 1.0/0.15 | 3.0/0.09 | 13.7/<0.01 | 6.6/<0.01 | 5.2/<0.01 | 1.1/0.33 |
| Elmidae | 25.3/<0.01 | 6.5/0.02 | 2.6/0.08 | 4.4/0.02 | 0.5/0.76 | 6.4/<0.01 |
| Psephenidae | 9.4/<0.01 | 0.0/0.99 | 1.0/0.38 | 3.8/0.03 | 2.4/0.06 | 2.2/0.12 |
| Uenoidae | 0.9/0.40 | 0.9/0.34 | 10.8/<0.01 | 3.9/0.03 | 0.5/0.76 | 0.5/0.63 |
| Dryopidae | 4.6/0.02 | 0.9/0.36 | 3.9/0.02 | 2.2/0.12 | 0.6/0.67 | 1.5/0.23 |
| Hydropsychidae | 26.0/<0.01 | 0.9/0.35 | 3.4/0.04 | 0.2/0.81 | 1.2/0.30 | 0.5/0.59 |
| Simuliidae | 0.7/0.51 | 0.6/0.43 | 23.5/<0.01 | 1.0/0.38 | 0.9/0.50 | 1.4/0.26 |
| Polycentropodidae | 9.7/<0.01 | 1.6/0.22 | 4.6/0.01 | 0.5/0.61 | 2.4/0.05 | 0.7/0.50 |
| Philopotamidae | 0.7/0.53 | 0.3/0.59 | 0.8/0.47 | 1.0/0.39 | 0.8/0.53 | 1.7/0.18 |
| Simpson | 10.7/<0.01 | 1.2/0.29 | 10.7/<0.01 | 0.1/0.89 | 4.5/<0.01 | 1.8/0.18 |

**Table S1.** *Cont.*

| **Classification** | **Location** | **Vegetation** | **Season** | **Location × Vegetation** | **Location × Season** | **Vegetation × Season** |
| --- | --- | --- | --- | --- | --- | --- |
| Shannon | 19.8/<0.01 | 3.6/0.06 | 18.8/<0.01 | 0.3/0.76 | 4.3/<0.01 | 3.4/0.04 |
| Evenness | 12.0/<0.01 | 0.8/0.36 | 12.5/<0.01 | 0.0/0.99 | 5.9/<0.01 | 1.5/0.23 |
| Filterer | 17.1/<0.01 | 0.7/0.41 | 0.8/0.46 | 0.6/0.55 | 0.9/0.50 | 1.0/0.39 |
| Gatherer | 8.9/<0.01 | 2.2/0.14 | 24.7/<0.01 | 1.6/0.22 | 3.2/0.02 | 2.4/0.10 |
| Collector | 17.2/<0.01 | 0.9/0.36 | 12.8/<0.01 | 1.8/0.17 | 3.1/0.02 | 0.1/0.87 |
| Grazer | 20.3/<0.01 | 7.0/0.01 | 19.0/<0.01 | 6.7/<0.01 | 2.1/0.08 | 3.8/0.03 |
| Total | 23.1/<0.01 | 2.0/0.16 | 19.7/<0.01 | 0.7/0.48 | 2.3/0.07 | 0.9/0.41 |
| b. Surber | F2,48/P | F1,48/P | F2,100/P | F2,48/P | F4,100/P | F2,100/P |
| Chironomidae | 0.0/1.0 | 1.3/0.26 | 8.6/<0.01 | 3.7/0.03 | 0.1/0.98 | 0.3/0.73 |
| Ephemerellidae | 2.4/0.10 | 0.1/0.81 | 4.8/0.0105 | 3.9/0.03 | 4.2/<0.01 | 1.8/0.16 |
| Leptophlebiidae | 2.6/0.08 | 0.7/0.40 | 0.5/0.5984 | 1.1/0.35 | 2.1/0.09 | 0.5/0.60 |
| Baetidae | 1.3/0.28 | 2.5/0.12 | 6.5/<0.01 | 0.3/0.75 | 1.7/0.16 | 1.0/0.36 |
| Siphlonuridae | 0.0/1.0 | 0.0/0.98 | 0.0/1.0 | 0.9/0.43 | 0.6/0.63 | 0.9/0.42 |
| Ameletidae | 0.0/1.0 | 0.0/1.0 | 0.0/1.0 | 1.6/0.21 | 0.0/1.0 | 0.0/1.0 |
| Hydropsychidae | 13.3/<0.01 | 0.5/0.48 | 1.2/0.32 | 1.3/0.29 | 0.5/0.77 | 0.4/0.67 |
| Simuliidae | 0.0/1.0 | 0.0/1.0 | 5.8/<0.01 | 1.6/0.21 | 0.6/0.64 | 0.4/0.70 |
| Polycentropodidae | 1.8/0.18 | 0.3/0.57 | 0.1/0.99 | 0.8/0.47 | 4.5/<0.01 | 1.4/0.25 |
| Simpson | 5.8/<0.01 | 0.2/0.65 | 20.0/<0.01 | 0.7/0.53 | 2.1/0.09 | 0.2/0.80 |
| Shannon | 15.4/<0.01 | 0.7/0.41 | 44.5/<0.01 | 1.2/0.32 | 4.0/<0.01 | 0.6/0.54 |
| Evenness | 5.9/<0.01 | 0.3/0.58 | 19.2/<0.01 | 0.7/0.52 | 3.0/0.02 | 0.5/0.64 |
| Filterer | 12.3/<0.01 | 0/0.99 | 9.8/<0.01 | 0.8/0.47 | 0.5/0.74 | 0.2/0.81 |
| Gatherer | 5.5/<0.01 | 0/0.98 | 32.1/<0.01 | 4.8/0.01 | 1.8/0.13 | 1.7/0.18 |
| Collector | 9.9/<0.01 | 0.1/0.84 | 39.2/<0.01 | 2.6/0.09 | 2.5/0.05 | 1.6/0.20 |
| Grazer | 9.8/<0.01 | 0.6/0.44 | 25.4/<0.01 | 6.7/<0.01 | 3.6/<0.01 | 1.3/0.28 |
| Total | 14.5/<0.01 | 0.2/0.63 | 47.9/<0.01 | 5.3/<0.01 | 2.9/0.03 | 2.4/0.09 |

**Table S1.** *Cont.*

| **Classification** | **Location** | **Vegetation** | **Season** | **Location × Vegetation** | **Location × Season** | **Vegetation × Season** |
| --- | --- | --- | --- | --- | --- | --- |
| c. Hester-Dendy | F2,30/P | F1,30/P | F2,64/P | F2,30/P | F4,64/P | F2,64/P |
| Chironomidae | 1.9/0.17 | 0.0/0.96 | 5.6/<0.01 | 1.8/0.19 | 1.4/0.26 | 0.1/0.96 |
| Ephemerellidae | 0.18/0.83 | 1.9/0.18 | 2.1/0.13 | 0.5/0.63 | 5.5/<0.01 | 1.3/0.27 |
| Heptageniidae | 8.1/<0.01 | 3.8/0.06 | 3.5/0.04 | 2.3/0.12 | 2.7/0.04 | 2.9/0.06 |
| Hydropsychidae | 3.0/0.06 | 0.6/0.42 | 2.7/0.07 | 0.7/0.52 | 0.7/0.58 | 1.1/0.34 |
| Simpson | 3.4/0.04 | 0.1/0.88 | 5.1/<0.01 | 2.1/0.14 | 2.1/0.09 | 0.7/0.49 |
| Shannon | 6.2/<0.01 | 0.1/0.73 | 6.1/<0.01 | 1.34/0.28 | 2.1/0.09 | 0.7/0.51 |
| Evenness | 4.1/0.03 | 0.1/0.74 | 6.2/<0.01 | 1.6/0.22 | 2.2/0.08 | 1.0/0.37 |
| Filterer | 5.6/<0.01 | 0.1/0.93 | 5.6/<0.01 | 1.0/0.39 | 0.4/0.83 | 0.5/0.61 |
| Gatherer | 2.6/0.09 | 0.4/0.54 | 7.2/<0.01 | 0.0/0.99 | 2.6/0.04 | 2.9/0.06 |
| Collector | 4.8/0.02 | 0.5/0.47 | 10.8/<0.01 | 0.3/0.74 | 1.7/0.16 | 2.1/0.13 |
| Grazer | 6.3/<0.01 | 2.5/0.12 | 1.9/0.15 | 0.4/0.67 | 2.0/0.10 | 1.8/0.17 |
| Total | 6.4/<0.01 | 1.2/0.30 | 11.1/<0.01 | 0.3/0.78 | 1.8/0.15 | 2.5/0.09 |

**Table S2.** Chemical and physical characteristics [mean (S.E.)] of streams with eastern hemlock and deciduous dominated riparian vegetation used to evaluate benthic collectors and grazers. For each main effect (vegetation, location and season), means within rows followed by
the same letter are not significantly different (α = 0.05). pH is listed in standard units, conductivity in microsiemens per cm, all others are
in mg/L.

|  | **Vegetation** | | **Location** | | | **Season** | | |
| --- | --- | --- | --- | --- | --- | --- | --- | --- |
| **Hemlock** | **Non** | **KYR** | **RF** | **RRG** | **Fall** | **Spring** | **Summer** |
| pH | 6.3 (0.1)b | 6.6 (0.1)a | 6.5 (0.1)a | 6.5 (0.1)a | 6.5 (0.1)a | 6.7 (0.1)a | 6.3 (0.1)a | 6.6 (0.1)a |
| Conductivity | 32.4 (3.0)b | 58. 7 (4.4)a | 28.4 (2.9)b | 43.7 (2.9)a | 61.2 (5.2)a | 60.1 (6.5)a | 37.2 (3.2)b | 42.4 (4.9)b |
| DO | 10.3 (0.2)a | 10.5 (0.2)a | 10.3 (0.2)b | 10.1 (0.2)b | 10.8 (0.2)a | 11.0 (0.2)a | 11.5 (0.1)a | 8.5 (0.2)b |
| Sulfate | 5.2 (0.3)b | 5.8 (0.4)a | 5.9 (0.4)b | 6.6 (0.4)a | 4.4 (0.4)c | 8.1 (0.6)a | 5.4 (0.4)b | 3.1 (0.2)b |
| Phosphate | 0.5 (0.1)a | 0.5 (0.1)a | 0.5 (0.1)a | 0.6 (0.1)a | 0.5 (0.1)a | 0.5 (0.1)a | 0.5 (0.1)a | 0.6 (0.1)a |
| Calcium | 0.9 (0.1)a | 0.6 (0.1)b | 0.9 (0.1)a | 0.8 (0.1)b | 0.6 (0.1)b | 0.3 (0.1)b | 1.5 (0.1)a | 0.2 (0.1)b |
| Magnesium | 2.8 (0.1)a | 2. 8 (0.1)a | 2.8 (0.2)ab | 2.9 (0.2)a | 2.7 (0.2)b | 3.7 (0.1)a | 1.4 (0.1)b | 3.8 (0.1)a |
| Nitrate | 0.3 (0.1)a | 0.3 (0.1)a | 0.2 (0.1)b | 0.4 (0.1)a | 0.3 (0.1)b | 0.3 (0.1)b | 0.2 (0.1)b | 0.4 (0.1)a |
| Ammonia | 0.02 (0.0)a | 0.02 (0.0)a | 0.02 (0.0)b | 0.02 (0.0)b | 0.04 (0.0)a | 0.02 (0.0)b | 0.03 (0.0)a | 0.02 (0.0)b |
| TC | 10.9 (1.2)b | 14.9 (1.3)a | 13.9 (2.2)b | 8.2 (2.2)c | 15.8 (1.2)a | 10. 7 (0.8)b | 7.4 (0.5)c | 21.3 (2.2)a |
| TOC | 7.2 (0.8)a | 9.9 (1.0)a | 9.5 (1.6)a | 5.8 (1.6)b | 9.8 (0.9)a | 5.8 (0.4)b | 5.1 (0.4)b | 14.7 (1.7)a |

© 2015 by the authors; licensee MDPI, Basel, Switzerland. This article is an open access article distributed under the terms and conditions of the Creative Commons Attribution license (http://creativecommons.org/licenses/by/4.0/).
